# Supplementary material
Source: PubMed Central journal article supplement (PMC387369)

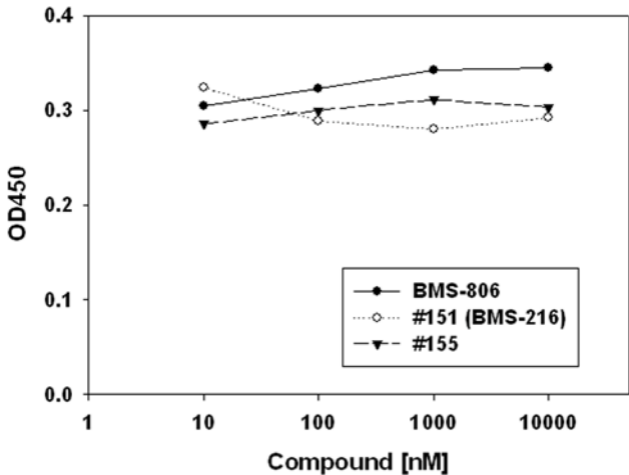

Supplement: pnas_101_14_5036__10.pdf [file pnas_101_14_5036__10.pdf]

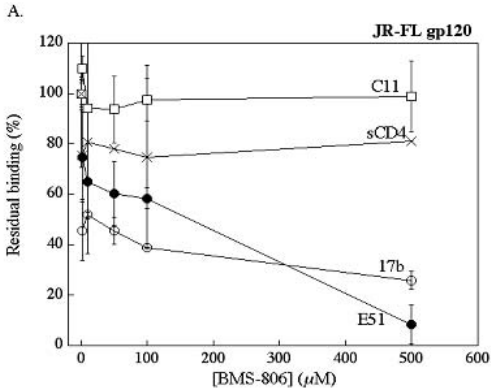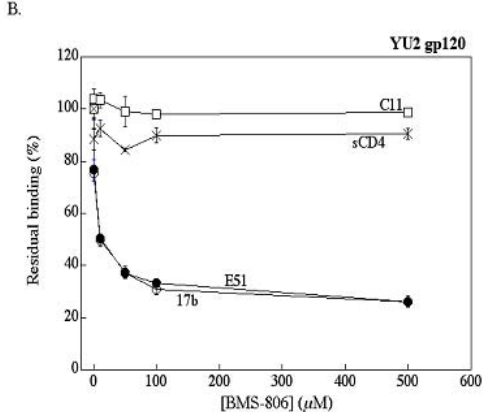

Supplement: pnas_101_14_5036__3.pdf [file pnas_101_14_5036__3.pdf]

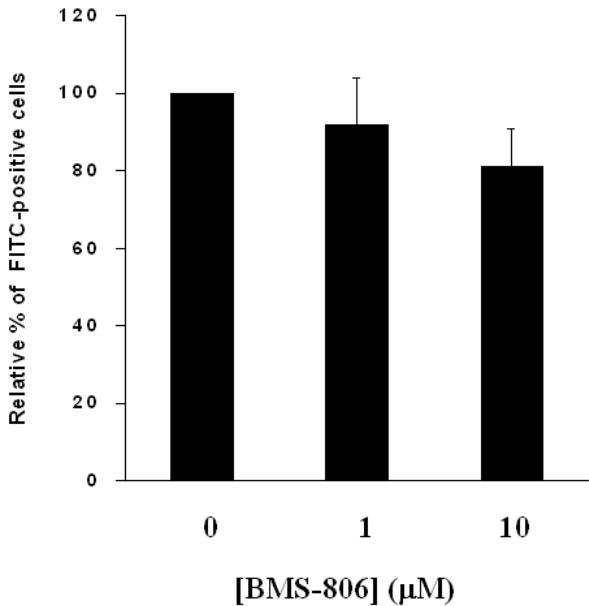

Supplement: pnas_101_14_5036__6.pdf [file pnas_101_14_5036__6.pdf]

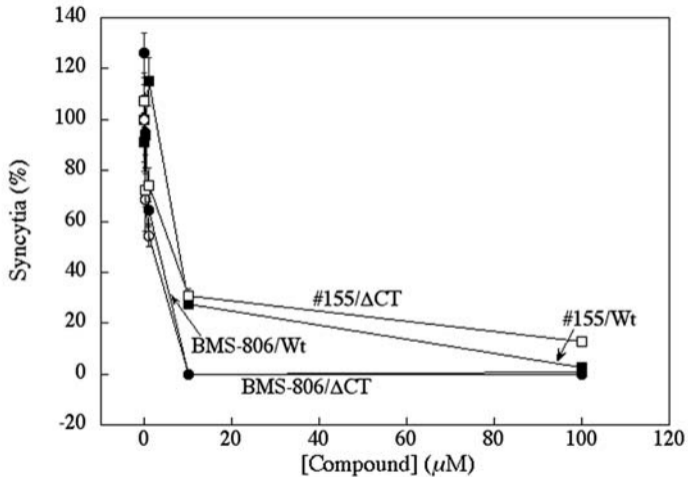

Supplement: pnas_101_14_5036__8.pdf [file pnas_101_14_5036__8.pdf]
